# Supplementary material for: Ceramide Composition in Exosomes for Characterization of Glioblastoma Stem-Like Cell Phenotypes
Source: Front Oncol. 2022 Jan 21;11:788100. doi: 10.3389/fonc.2021.788100 (PMC8814423; doi:10.3389/fonc.2021.788100)
Supplement: Supplementary file 2 [file DataSheet_2.xlsx]

## Sheet: Characterization of GSCs
				MES-N			MES-SN			PN
Name of GSC phenotype in other papers				GBM 38			GBM 18			GBM 27
Clinical data [86]		Sex		F			M			F
		Age		63			59			61
		Diagnosis		GBM			GBM			GBM/Gliosarcoma
		Dissemination		Nodular, nodular-like tumor mass, well-defined boundaries			Highly disseminating, nodular-like tumor mass, boundaries were not well defined			Highly disseminating
In vitro growth [86]		Morphology		Monolayer of cells in combination with spheres.			Monolayer of cells in combination with spheres.			Spheres in suspension.
		Proliferation rate		++			+++			+
		Population doubling time		+			++			+++
		single oncosphere cells expansion		+			++			+++
		colony formation assay*		+			++			+++
In vivo growth (orthotopic transplantations) [83,86]		Tumor formation		Nodular tumor mass, well-defined boundaries.			Nodular tumor mass, undefined boundaries. Surrounding blood vessels			Almost no tumoral mass formation, indistinct boundaries.
		Proliferation rate		++			++			+++
		Dissemination		Nodular. Cells remain within the ipsilateral hemisphere.			Semi-Nodular. Highly disseminating, invading neighbouring areas and contralateral hemisphere.			Highly disseminating, invading neighbouring areas and contralateral hemisphere.
		Overall survival		Average of 100 days after transplantation.			Average of 100 days after transplantation.			Average of 220 days after transplantation.
		BBB state		Disrupted.			Disrupted1.			Intact.
CSCs gene markers [86]		CD133		+			++			+++
		SSEA-1		+			++			+++
		CD44		+			++			+++
Stemness gene markers [86]		OCT 3/4		++			+			+++
		BMI		+			+			++
		SOX-2		+			++			+++
		NESTIN		+			++			+++
		TERT		++			+			+++
		MELK		++			+			+++
Differentiation gene markers [86]		GFAP		+			++			+++
		S100β		+			+			++
		β-III-Tubulin		+			+			++
		PDGFRa		+			+			+
		CNPase		+			++			+++
Migration and invasiveness gene markers [86]		CD90		+			++			+++
		CD144		+			++			+++
		CD166		+			++			+++
		CD24		+			++			+++
		CD73		+			++			+++
		Olig2		+			++			+++
Chromosomal Instability [86]		Level		Highly unstable along passages in vitro.			Highly stable along passages in vitro.			Moderately stable along passages in vitro.
		Gains/Losses		22 DNA gains in 11 chromosomes.	28 DNA losses in 17 chromosomes.		3 DNA gains in 3 chromosomes.	25 DNA losses in 15 chromosomes.		11 DNA gains in 10 chromosomes.	26 DNA losses in 11 chromosomes.
Metabolic characterization [78]		Phenotypes		Highly glycolitic.			Highly glycolitic.			Fluctuates from glycolytic to oxidative.
		Oxygen consumption rate (OCR)-linked ATP production		0.2523			0.348			0.517
		Extracellular acidification rate (ECAR)-linked ATP production		0.7477			0.652			0.483
							+ means lowest compared to each other +++ means highest compared to each other
							*Data not shown
							86. https://doi.org/10.18632/oncotarget.11676			García-Romero, N et al Oncotarget 2016
							83. https://doi.org/10.18632/oncotarget.13635			Rackov G et al. frontiers in Oncology 2020
							78. 10.3390/cells10020202			Duraj, T et al. Cells 2021

## Sheet: Raw data
	Cells MES-N							Cells MES-SN							Cells PN								EXO MES-SN						EXO PN						EXO MES-N										AB MES-SN
C14 Cer	2567265	146492	146568	418743	1149474	4040678		1728003	2492252	1911882	1054909	1233903	1585806		1611222	2801334	4077989	1377259	3643801	4241944			4982019	5522507	10200000	10900000	7413162		4151180	6652080	7672140	7302222	6730475		10700000	1873192	2180473	721088	9833706	2794372	6675053	149023			4066059	17800000	32200000	19000000	21200000
C14:1 Cer	80473	45369	10416	36215	143484	143052		246008	134396	128257	107825	41507	93969		75829	88223	74036	48522	69915	61698			391490	277843	398039	191320	268145		50496	17493	126587	73868	73613		753435	140934	230411	128040	825250	88618	179868	13555			1	549325	1114207	690977	642426
C16 Cer	9639451	438837	548532	806711	2235912	13400000		8105229	10200000	9201579	5804694	6973491	8002825		3624818	7669511	10700000	1764348	8824028	7322733			11500000	14400000	43600000	42900000	12700000		19700000	20200000	20300000		21200000		36600000	3855204	5480702	1505549	16500000	11800000	31600000	807280			20300000	60100000	91700000	69600000	75900000
C16:1 Cer	188922	12821	25001	39525	619897	1199617		344391	235206	210412	175136	113262	143343		54599	75487	115548	33766	62707	75458			750845	922168	716619	1145258	984340		349196	285477	381259	363301	324967		1287575	307165	565352	139393	1021851	776657	915545	28154			457350	1535905	2742105	1955048	1939657
C18 Cer	912806	73215		93880	230779	1259253		599057	852896	786921	567412	694092	544685		1668948	2693201	3482197	463427	4507319	2114571			732416	799578	5100177	5154417	441714		8580677	5639356	5233211		7098992		6939646	538404	626572	298123	2800234	1569178	5025147	229064			2539416	6356102	7233910	6689683	7609265
C18:1 Cer	267540	37260	54393	122710	253894	735836		344504	337057	340467	11574	252492	307769		714360	779770	1034833	415823	1035861	1168554			297211	756662	1397947	1979806	1092831		1235547	1413540	1245394		1188257		1467156	326913	366067	174782	1103560	425584	832929	85887			359664	1449934	3372866	1983532	2299390
C20 Cer	525157	643603	691905	428387	445396	701744		838880	1223711	1057091	807655	1036087	903648		1376639	1731910	1918611	556475	2313010	1406569			821687	775903	3533320	3233948	606092		1625936	1030535	1204284		1683870		3572708	618743	579489	475060	1479609	917643	2828501	706841			1218362	3614968	4235238	3711678	4742721
C20:1 Cer	797283	446387	407906	381943	682564	1227993		546218	738065	745823	460357	644552	521062		851976	1091867	1333842	422039	1482571	1290435			626663	699875	1439418	1831109	853915		878623	1312419	1241116		1000797		2055060	502103	947547	465395	1713741	1218670	1887141	349252			677314	1590822	2900079	1787216	2105158
C22 Cer	472344	144567	136192	148970	352827	802480		2451180	3655898	2699691	2072268	3443688	2288849		1352335	2908081	4379820	133928	4561711	1839319			652473	493732	12100000	10300000	438668		2542142	1186010	1307210		2120003		15800000	1254506	637820	793719	7114991	2855675	12400000	431257			4664292	12900000	11600000	11500000	16500000
C22:1 Cer	67991	49679	85691	57189	149332	369802		117308	116609	94857	114155	118002	70796		71578	88084	84920	65022	102146	173965			127290	118594	179832	134563	77165		71675	60181	64639	30625	139888		739964	142570	199708	175991	669865	439581	974545	153267			179560	528529	778955	604394	655875
C24 Cer	294341	171887	169272	168292	253368	269579		4675924	6430873	4715566	4351763	6738739	3942980		865548	1923394	3213535	210906	3625675	985631			780807	445364	17500000	13200000	535018		2143746	783430	672127	1323854	1206451		13200000	1057525	511516	921253	9341081	2128236	10200000	344548			7478622	20000000	15100000	14300000	22600000
C24:1 Cer	3552737	266341	604107	394455	3232070	8162333		21900000	39400000	33900000	16600000	28500000	24200000		9883802	23500000	24500000	598452	27100000	17300000			9910564	11700000	70200000	77600000	8916746		12800000	11400000	9848779		14300000		71800000	4998032	7921309	4116025	41300000	29300000	62400000	1278207			36500000	115000000	150000000	109000000	144000000
C26 Cer
C26:1 Cer	4234				6067	66488		209519	173350	189963	1514366	201153	156892			285322	702835		507484	133667			256364	113386	5774963	5301756	62827		235565	95444	106530	156930	190265		4068984	169232	130605	225140	1956586	1085578	5343141				2309613	8668088	8166182	7279109	8541506
[truncated: 43 more columns]

## Sheet: Normalized data
	Cells									EXO									AB									MV
	Cells MES-N			Cells MES-SN			Cells PN			EXO MES-SN			EXO PN			EXO MES-N			AB MES-SN			AB PN			AB MES-N			MV MES-SN			MV PN			MV MES-N
	Mean	SEM	N	Mean	SEM	N	Mean	SEM	N	Mean	SEM	N	Mean	SEM	N	Mean	SEM	N	Mean	SEM	N	Mean	SEM	N	Mean	SEM	N	Mean	SEM	N	Mean	SEM	N	Mean	SEM	N
C14 Cer	11.8128	5.50241	6	3.23452	0.433162	6	7.67609	1.34685	6	8.55516	1.33389	5	12.1547	1.1655	5	6.3647	2.28752	8	6.94328	1.31586	7	10.0163	1.89475	7	5.32794	1.35309	10	5.43119	0.973246	7	9.94033	1.95905	7	3.81506	0.734691	10
C14:1 Cer	0.433881	0.196166	6	0.0414828	0.0572809	6	0.000291352	0.0146485	6	0.19825	0.0439885	5	0	0.0336786	5	0	0.172562	8	0.0120743	0.0548146	7	0	0.0212776	7	0	0.0822526	10	0	0.041027	7	0	0.00324145	7	0	0.0474717	9
C16 Cer	38.2354	19.4671	6	16.442	1.31762	6	17.4846	3.61813	6	27.7434	8.31151	5	38.3193	0.589953	4	20.6748	7.63495	8	25.5546	3.40688	7	36.1982	5.275	7	18.14	5.31691	10	25.7091	3.83567	7	37.374	6.32805	7	16.1158	2.6545	10
C16:1 Cer	2.7448	1.65881	6	0.203566	0.0691437	6	0	0.0296506	6	0.86527	0.0876013	5	0.514716	0.0314027	5	0.524075	0.247236	8	0.371649	0.145047	7	0.413809	0.0603176	7	0.401584	0.26066	10	0.409798	0.0775467	7	0.465617	0.0508149	7	0.223089	0.0815919	10
C18 Cer	4.16271	2.05751	5	1.17765	0.106133	6	6.42572	1.53518	6	2.58366	1.22203	5	12.4124	1.43861	4	3.06174	1.38461	8	2.41678	0.289917	7	13.2341	1.83025	7	3.07534	0.785255	10	3.16647	0.484283	7	13.9016	2.38642	7	3.88446	0.73842	10
C18:1 Cer	1.87237	0.901954	6	0.331951	0.109157	6	2.09509	0.299639	6	1.08934	0.3177	5	2.27153	0.0930023	4	0.473494	0.269559	8	0.588604	0.140702	7	2.35546	0.321807	7	0.269833	0.13015	10	0.563883	0.12467	7	2.30306	0.341988	7	0.315568	0.0875351	10
C20 Cer	4.66313	0.426684	6	1.80627	0.133036	6	3.93442	0.648741	6	1.85758	0.726228	5	2.4897	0.301545	4	1.72344	0.64801	8	1.34804	0.200502	7	2.23427	0.389815	7	1.45913	0.476463	10	1.75634	0.301345	7	2.3098	0.386412	7	2.0629	0.463666	10
C20:1 Cer	5.3846	1.1312	6	1.04344	0.100288	6	2.68113	0.421689	6	1.07296	0.26066	5	1.96461	0.191759	4	1.32482	0.376953	8	0.558633	0.10437	7	1.49198	0.265663	7	0.886862	0.202636	10	0.594676	0.0996388	7	1.57189	0.257833	7	0.792856	0.156756	10
C22 Cer	2.70445	0.917648	6	5.51328	0.542924	6	6.53444	1.89712	6	5.20426	2.93088	5	3.25052	0.615254	4	7.60787	3.3159	8	4.81208	0.656987	7	4.15934	0.637231	7	8.3314	1.98201	10	6.1842	1.03205	7	3.85052	0.627392	7	11.3177	2.44469	10
C22:1 Cer	0.889417	0.427414	6	0	0.0160856	6	0.0744541	0.0429535	6	0	0.0183161	5	0.0094283	0.0340736	5	0.221893	0.178093	8	0	0.0343644	7	0.0811992	0.0312743	7	0.251595	0.161185	10	0.00422464	0.0231799	7	0.0837964	0.0198142	7	0.154419	0.0729529	10
C24 Cer	1.66654	0.200811	6	10.4278	0.976235	6	4.60811	1.48775	6	7.09368	4.10138	5	2.18696	0.491753	5	6.90747	2.91538	8	6.82174	0.907416	7	2.3869	0.403565	7	7.63767	1.64932	10	9.73423	1.57103	7	2.40448	0.40081	7	11.1035	2.56713	10
C24:1 Cer	22.8119	10.609	6	56.5369	7.01581	6	45.3697	11.062	6	39.608	17.4527	5	22.7078	1.79964	4	43.143	15.4904	8	45.4623	5.99859	7	26.7748	4.57962	7	47.0508	10.0781	10	41.8831	6.76008	7	25.3896	5.09438	7	43.8848	7.70065	10
C26 Cer
C26:1 Cer	0	0.174325	3	0.625689	0.458526	6	0.897256	0.331761	4	2.42339	1.4754	5	0.167275	0.0492964	5	2.43773	1.23352	7	2.72014	0.392603	7	0.398289	0.0881003	7	2.88956	1.10218	10	3.02996	0.545507	7	0.366414	0.0830885	7	3.53976	0.81295	10

## Sheet: Ratios
		MES-N			MES-SN			PN
		Mean	SD	N	Mean	SD	N	Mean	SD	N
Cells	C16:0/24:1 Cer	1.60792	0.30248	6	0.30425	0.02143	6	0.80449	0.42917	6
Exosomes	C16:0/24:1 Cer	0.99787	0.17357	5	0.53487	0.05274	8	1.71367	0.13168	4
		Cells	MES-N	MES-SN	PN		Exosomes	MES-N	MES-SN	PN
		MES-N		****	***		MES-N		****	****
		MES-SN	****		*		MES-SN	****		****
		PN	***	*			PN	****	****
		One-way ANOVA; Tukey post hoc
		*	< 0.05
		**	< 0.01
		***	< 0.001
		****	< 0.0001
